# Supplementary material for: Emulsion polymerization for the fabrication of poly(o-phenylenediamine)@multi-walled carbon nanotubes nanocomposites: characterization and their application in the corrosion protection of 316L SS
Source: Royal Society of Chemistry journal article supplement (doi:10.1039/c5ra11295h), 2015-01-01
Supplement: c5ra11295h1.pdf [file c5ra11295h1.pdf]

**Emulsion Polymerization for Fabrication of Poly (o-phenylenediamine) @  
Multi-walled Carbon Nanotube nanocomposite: Characterization and Its  
Application to the Corrosion Protection of 316L SS**

Ehsan Nazarzadeh Zare<sup>a</sup>, Moslem Mansour Lakouraj<sup>a\*</sup>, Shahram Ghasemy<sup>b</sup>, Elham Moosavi<sup>a</sup>

<sup>a</sup> Department of Organic-Polymer Chemistry, Faculty of Chemistry, University of Mazandaran,  
Babolsar, Iran

<sup>b</sup> Department of Nanotechnology, Faculty of Chemistry, University of Mazandaran, Babolsar,  
Iran

Email: [lakouraj@umz.ac.ir](mailto:lakouraj@umz.ac.ir); Tel-fax: +981125342350; postal code: 47416

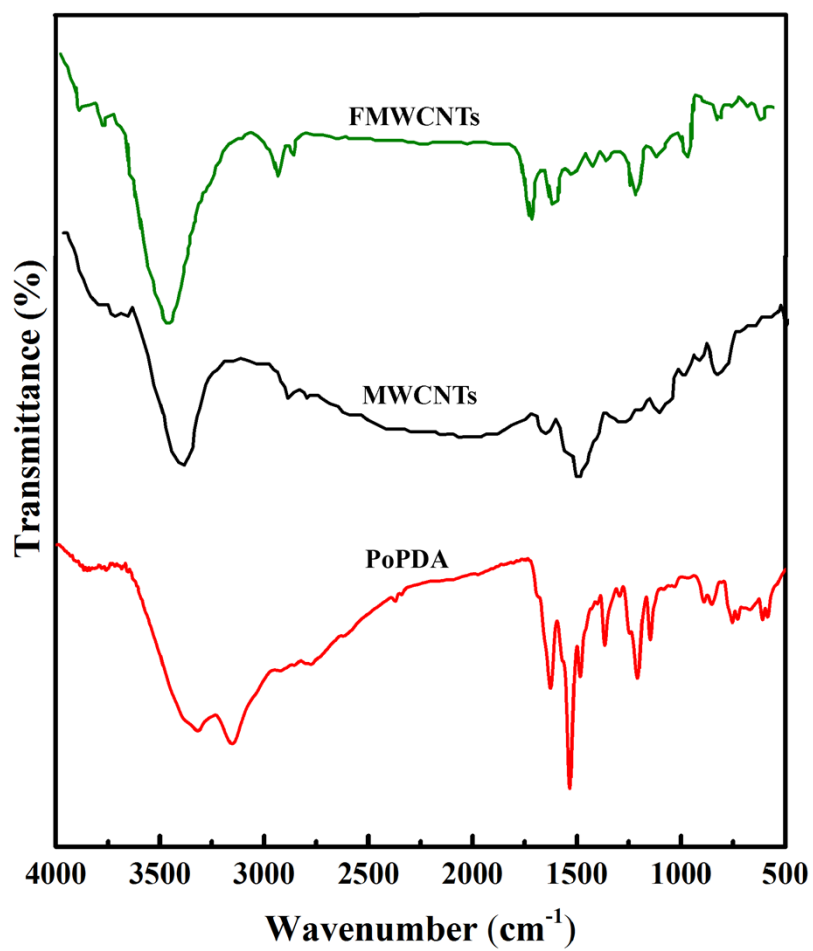

**Fig. S1.** FT-IR of PoPDA, MWCNTs and FMWCNTs

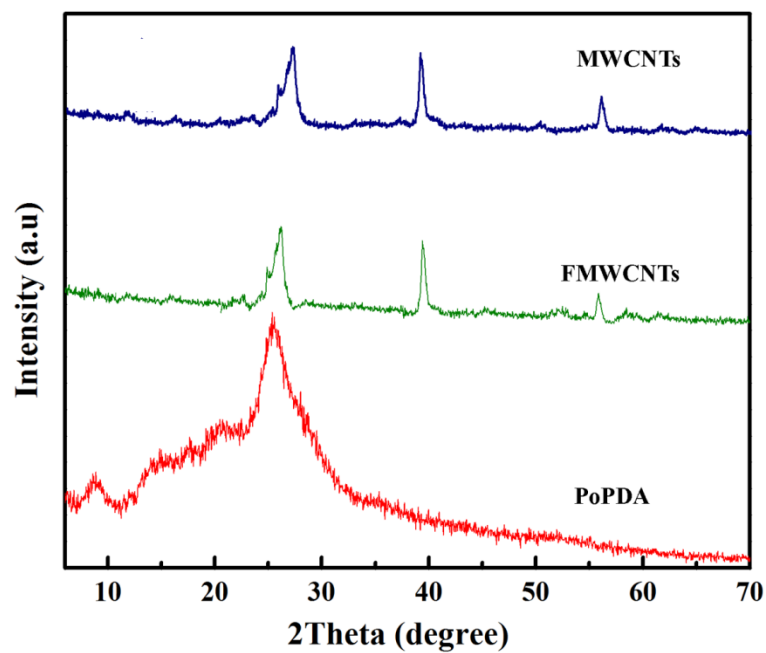

**Fig. S2.** XRD of PoPDA, MWCNTs and FMWCNTs

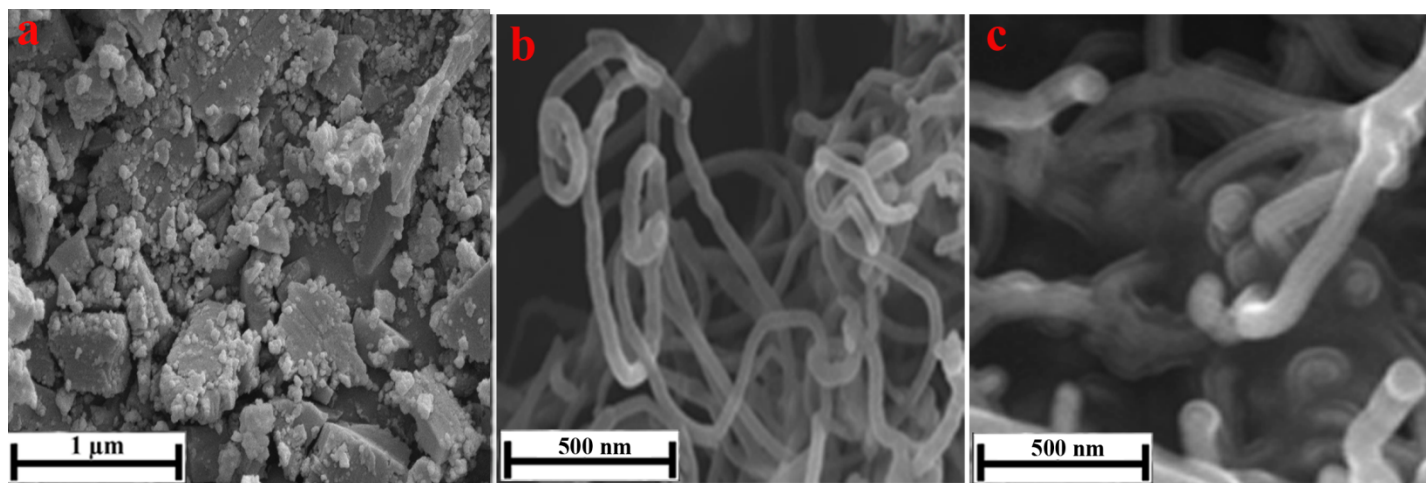

**Fig. S3.** SEM of PoPDA (a), MWCNTs (b) and FMWCNTs (c)

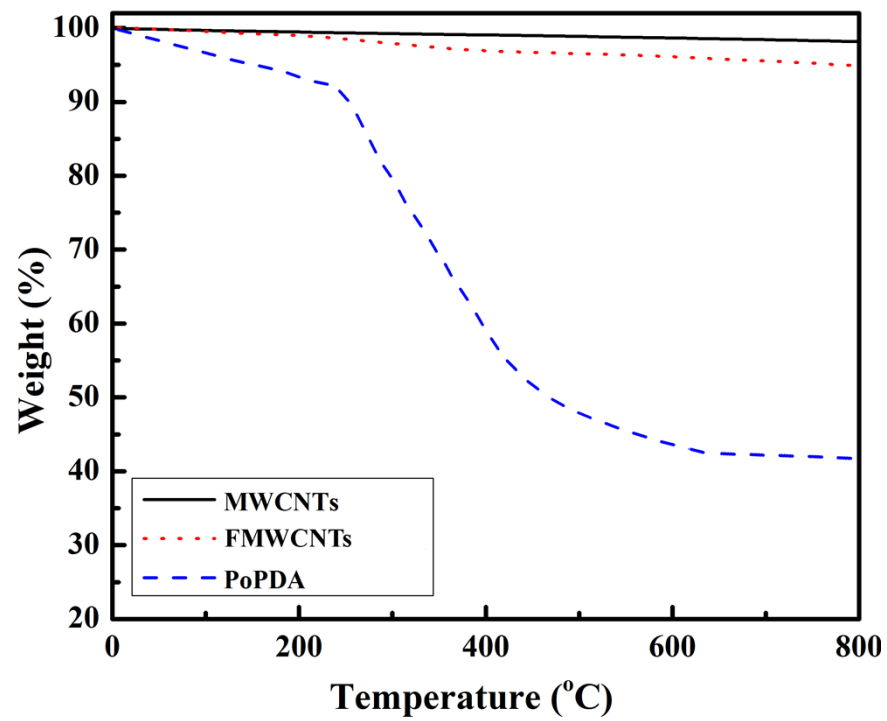

**Fig. S4.** TGA of PoPDA, MWCNTs and FMWCNTs

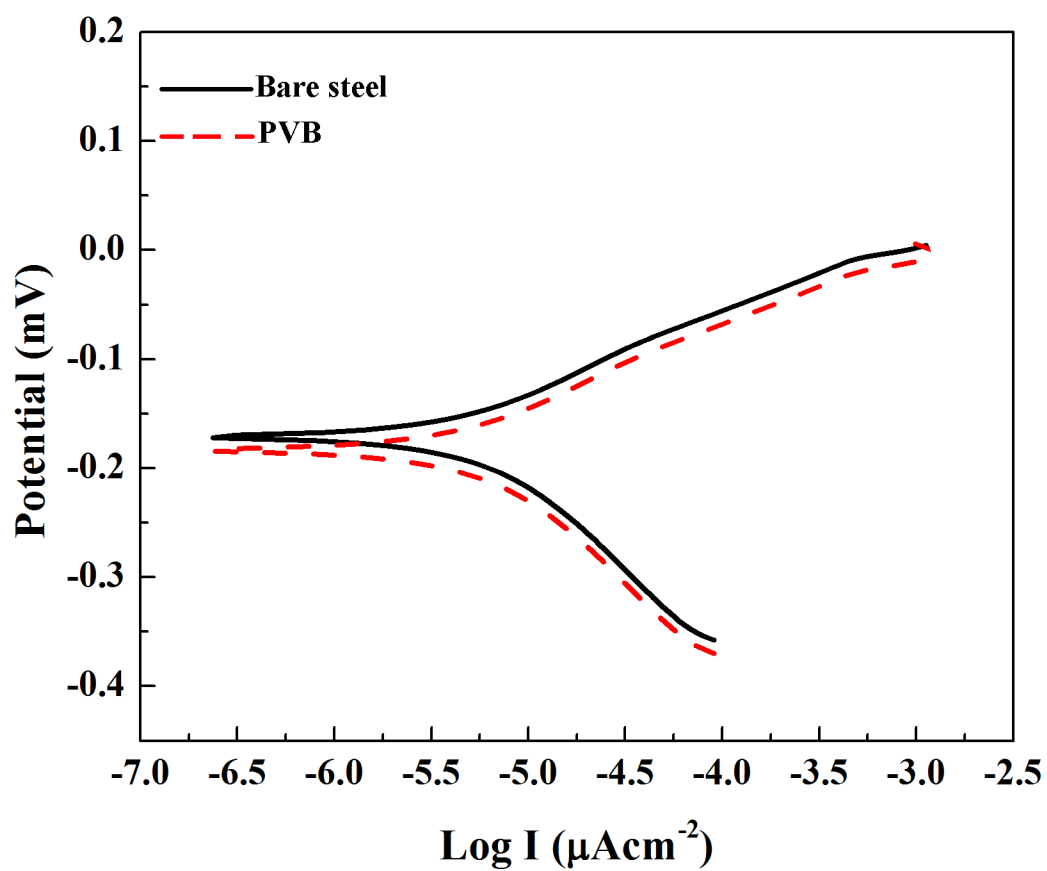

**Fig. S5.** Tafel plots of uncoated steel and coated by PVB in 3.5 wt % NaCl solution

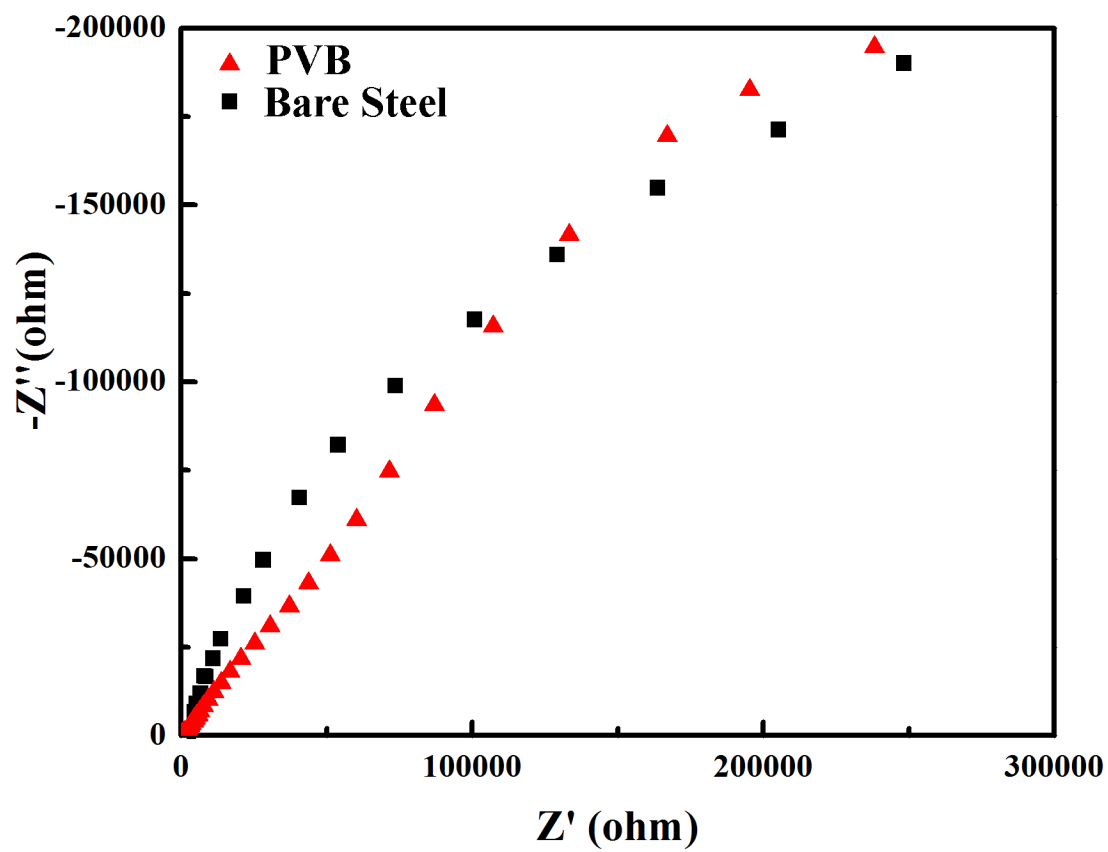

**Fig. S6.** The Nyquist plots of uncoated steel and coated by PVB in 3.5 wt % NaCl solution

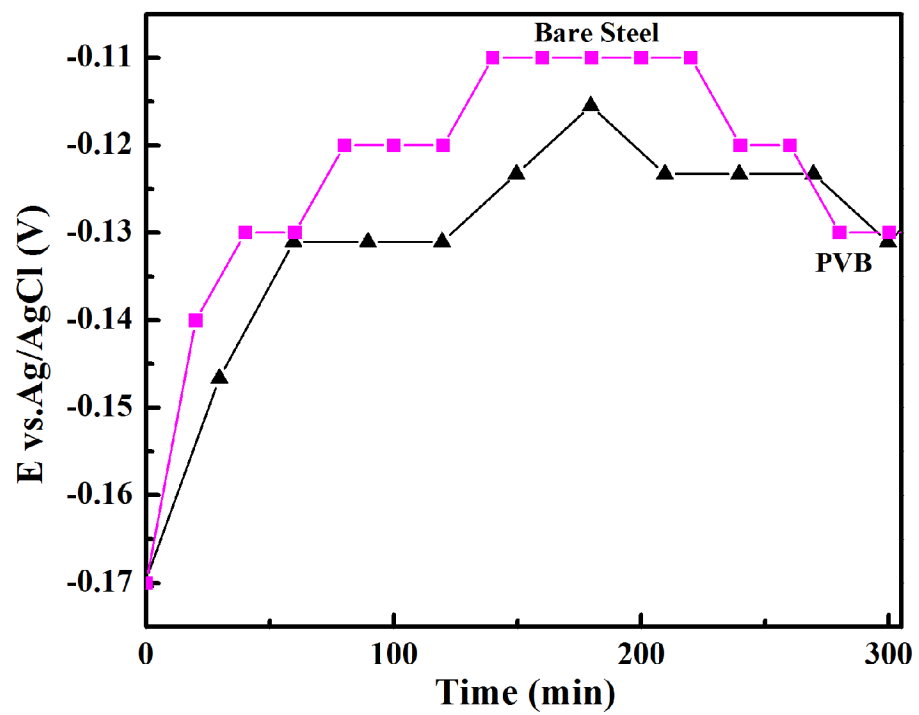

**Fig. S7.** Open circuit potential measurements for uncoated steel and coated by PVB in 3.5 wt % NaCl solution
